# Supplementary material
Source: PubMed Central journal article supplement (PMC9263811)
Supplement: mmc1.pdf [file mmc1.pdf]

**Supplemental information**

**Multi-omics personalized network analyses  
highlight progressive disruption of central  
metabolism associated with COVID-19 severity**

**Anoop T. Ambikan, Hong Yang, Shuba Krishnan, Sara Svensson Akusjärvi, Soham Gupta, Magda Lourda, Maike Sperk, Muhammad Arif, Cheng Zhang, Hampus Nordqvist, Sivasankaran Munusamy Ponnann, Anders Sönnnerborg, Carl Johan Treutiger, Liam O'Mahony, Adil Mardinoglu, Rui Benfeitas, and Ujjwal Neogi**

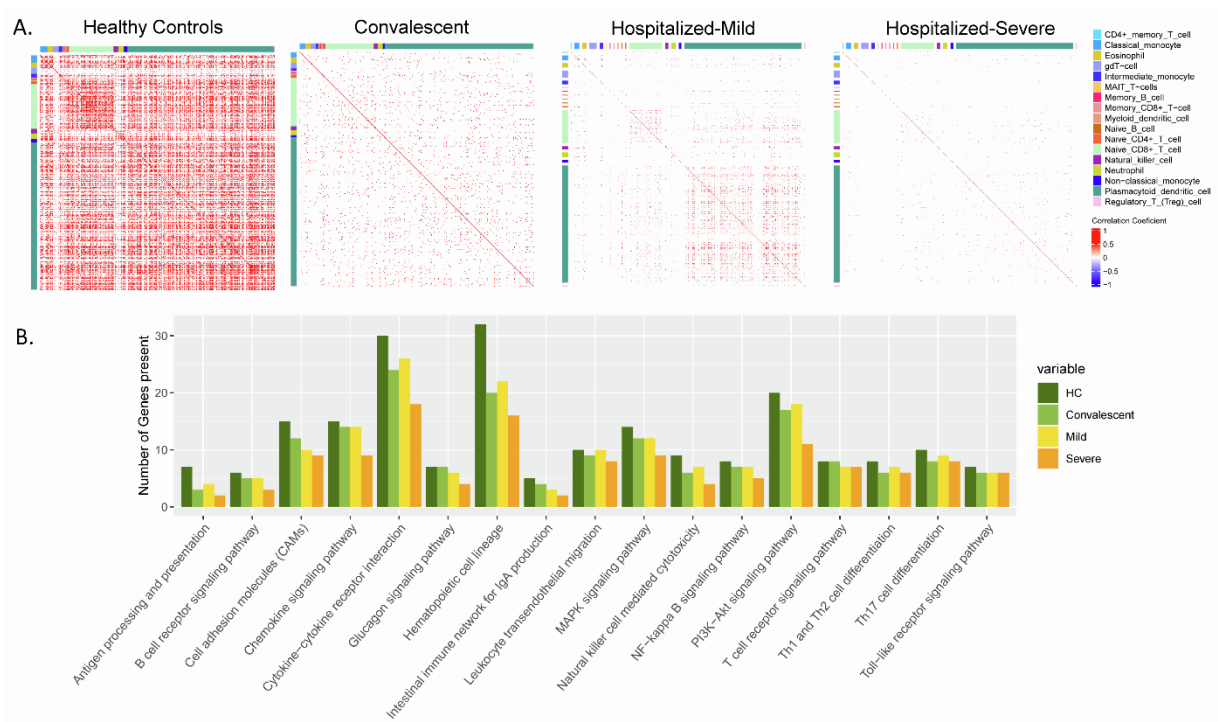

**Figure S1: Association between marker genes and pathways related to lost marker genes. (A)** Heatmap of significant correlations among marker genes in healthy (adj  $p < 0.001$ ), convalescent (adj  $p < 0.001$ ), hospitalized mild (adj  $p < 0.001$ ), and hospitalized severe samples (adj  $p < 0.2$ ). Column annotation represents corresponding cell types. **(B)** Bar graph showing the number of genes present in healthy, convalescent, hospitalized, mild hospitalized, severe in each of the significant pathways identified in lost marker gene associations.

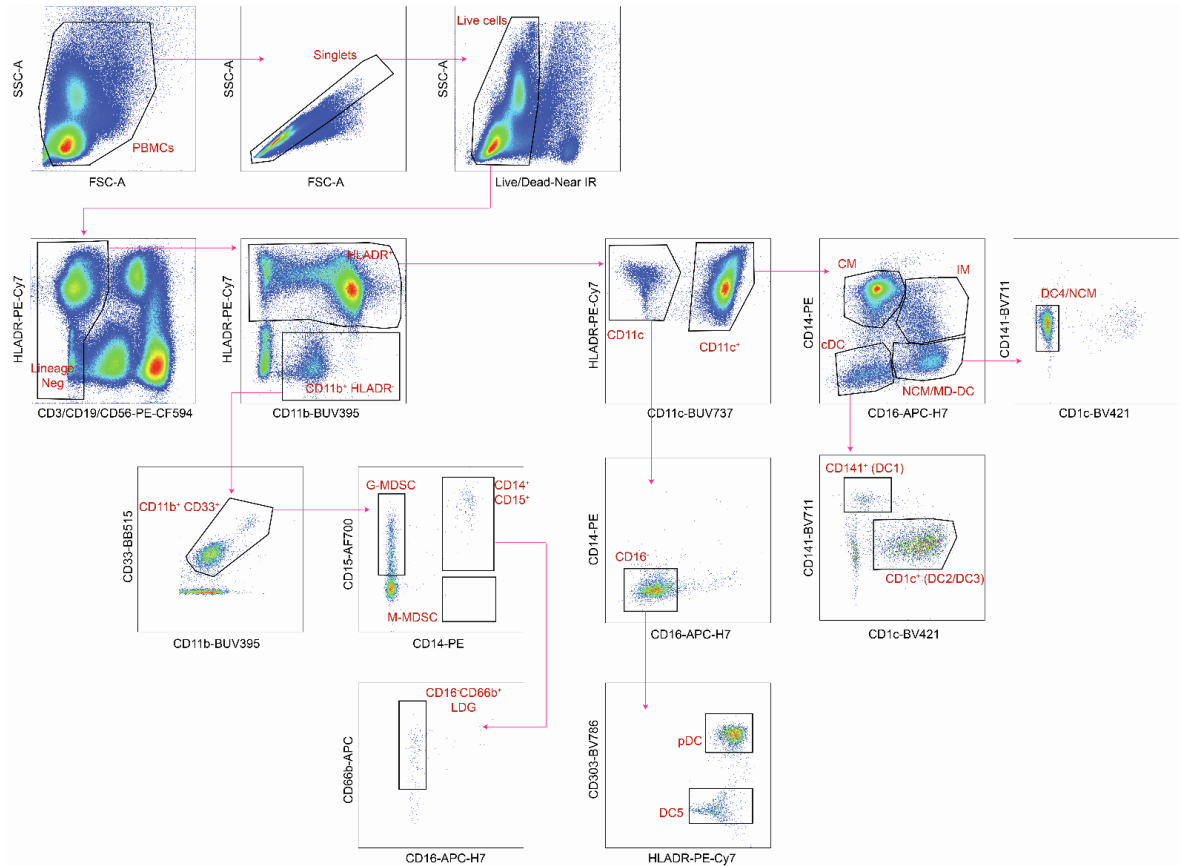

**Figure S2:** Gating strategy of the mononuclear phagocytes (MNPs).

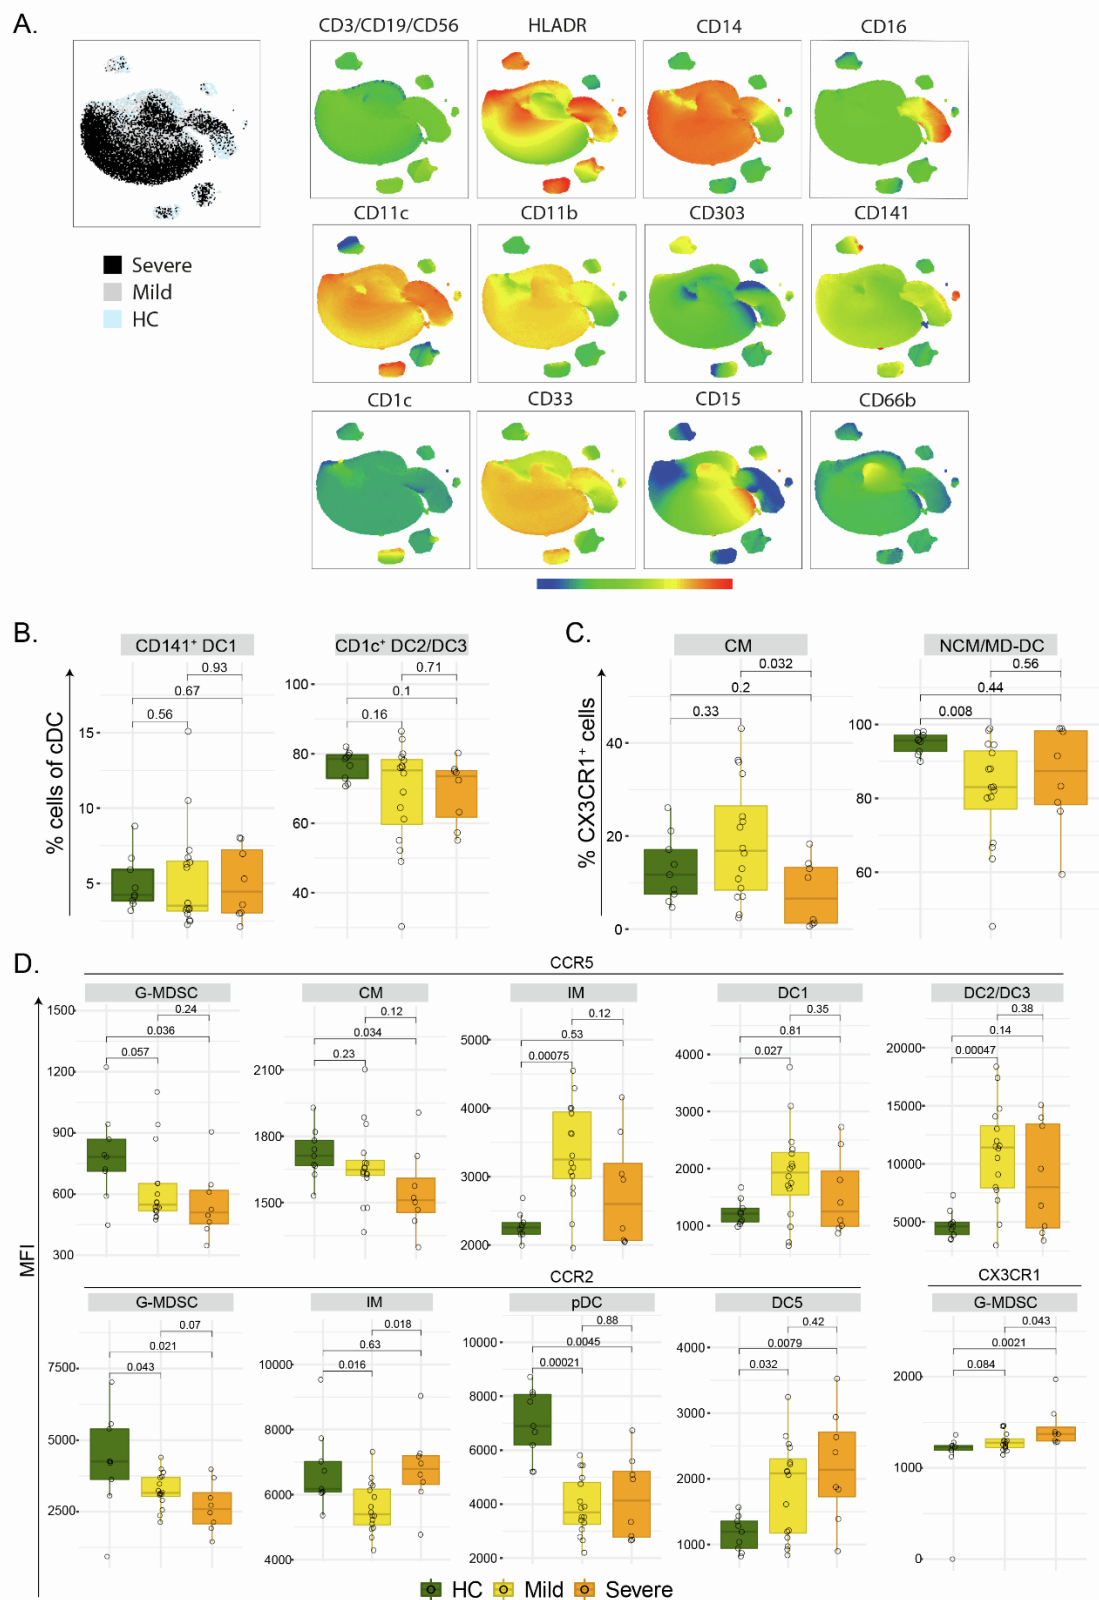

**Figure S3:** (A) UMAP showing differences in cell populations between HC, mild, and severe COVID-19 patients (left); cell identity was based on marker expression (right). (B) Box plots showing the percentage of CD141<sup>+</sup> DC1 cells and CD1c<sup>+</sup> DC2/DC3 cells of cDCs. (C) Box plots showing the percentage of CX3CR1<sup>+</sup> CM and NCM/MD-DC cells. (D) Box plots showing median fluorescence intensity (MFI) of chemokine the receptors CCR5, CCR2, and CX3CR1 in different MNPs. P-values were determined by the Mann-Whitney U test.

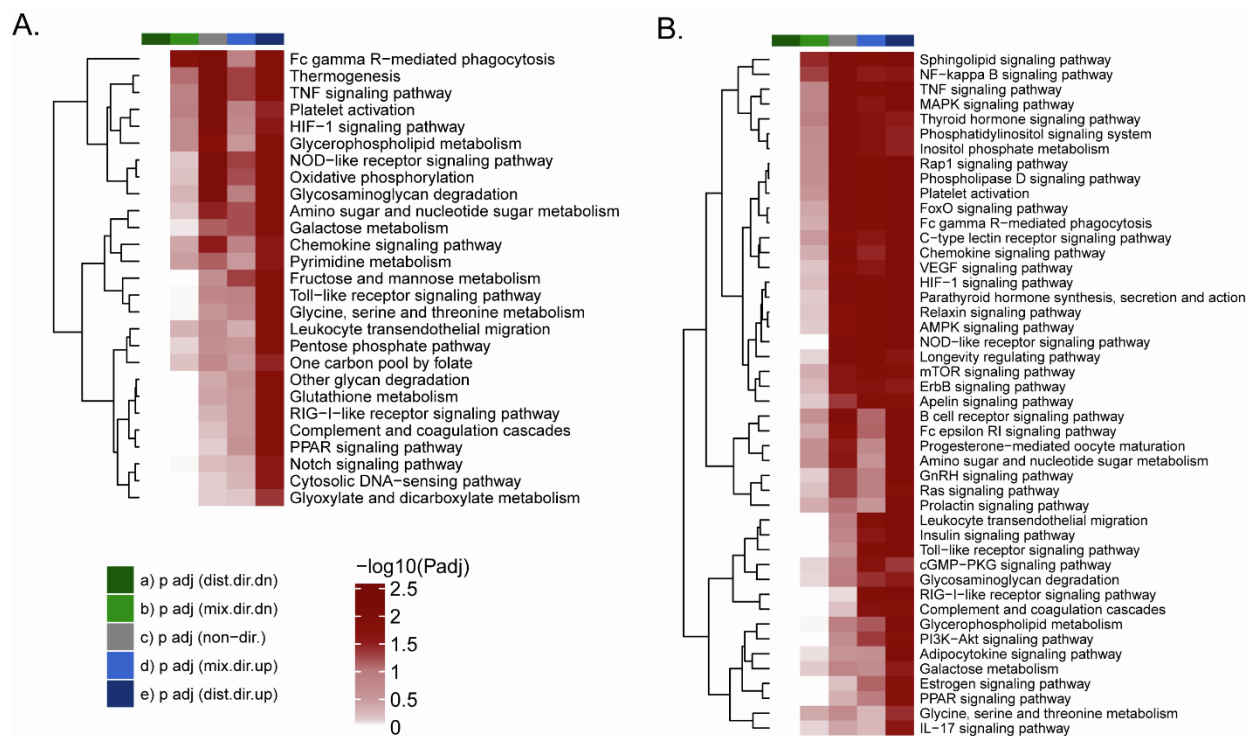

**Figure S4. Gene set enrichment analysis.** (A) Heatmap visualizing significantly regulated KEGG pathways (adj  $p < 0.05$ ) in COVID-19 mild compared to healthy individuals. The color scale represents adjusted p-values of different directionality classes of regulation. (B) Heatmap visualizing significantly regulated KEGG pathways (adj  $p < 0.05$ ) in COVID-19 severe in comparison with healthy individuals. The color scale represents adjusted p-values of different directionality classes of regulation.

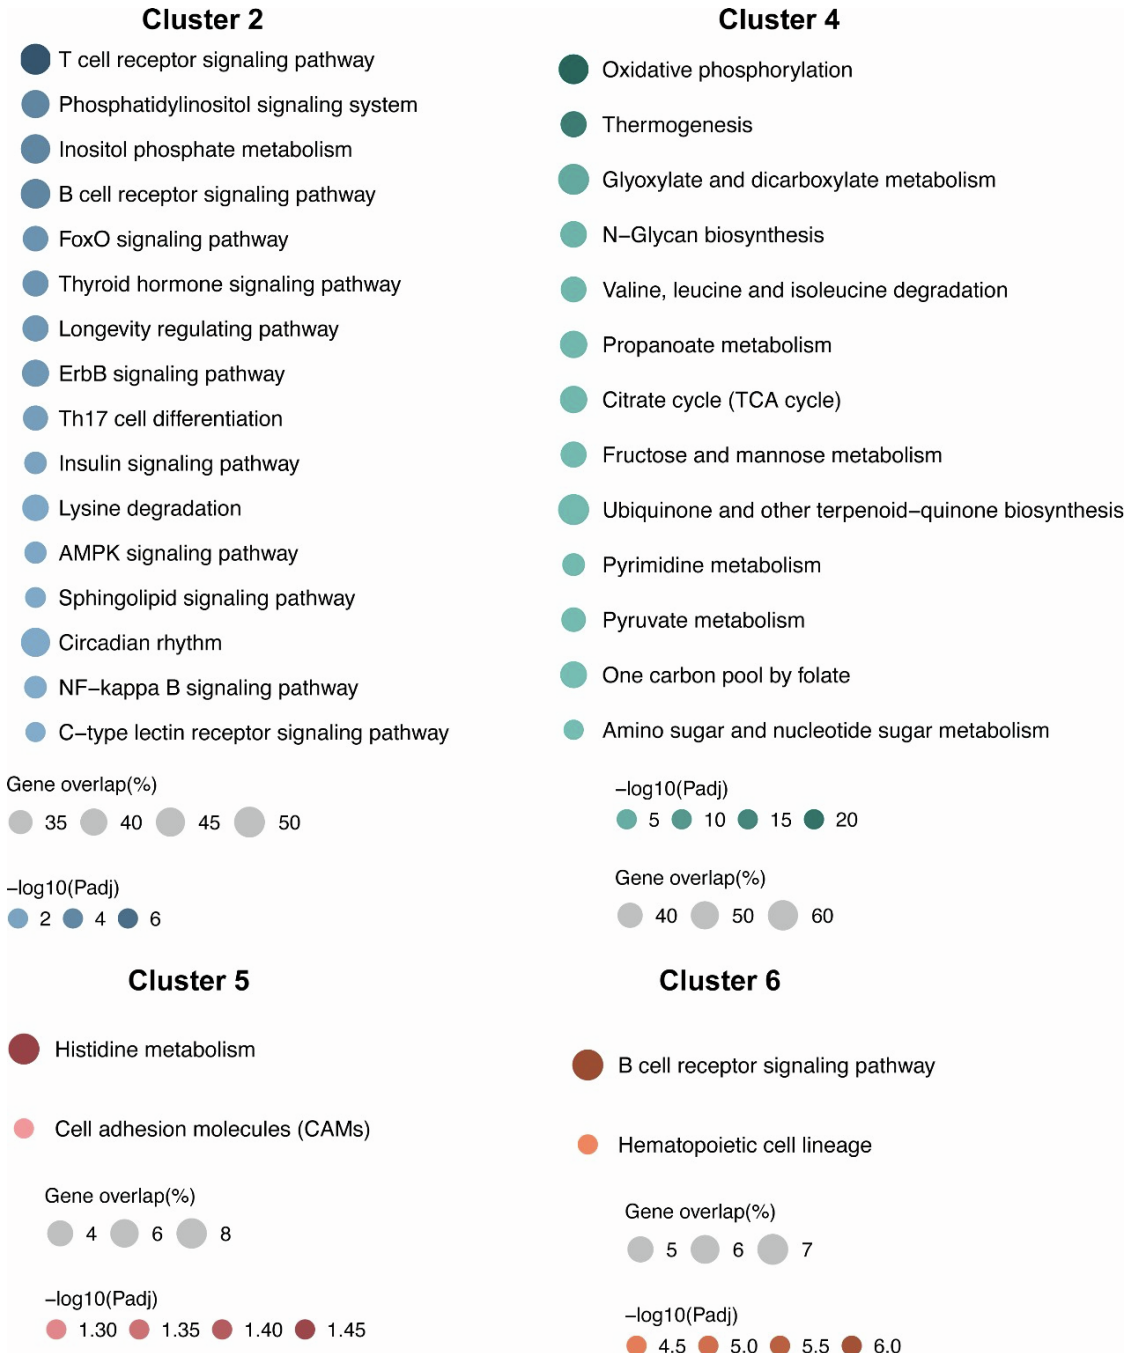

**Figure S5: Gene set enrichment analysis: KEGG gene set enrichment analysis results of communities identified in transcriptomics metabolomics association network topology analysis.**

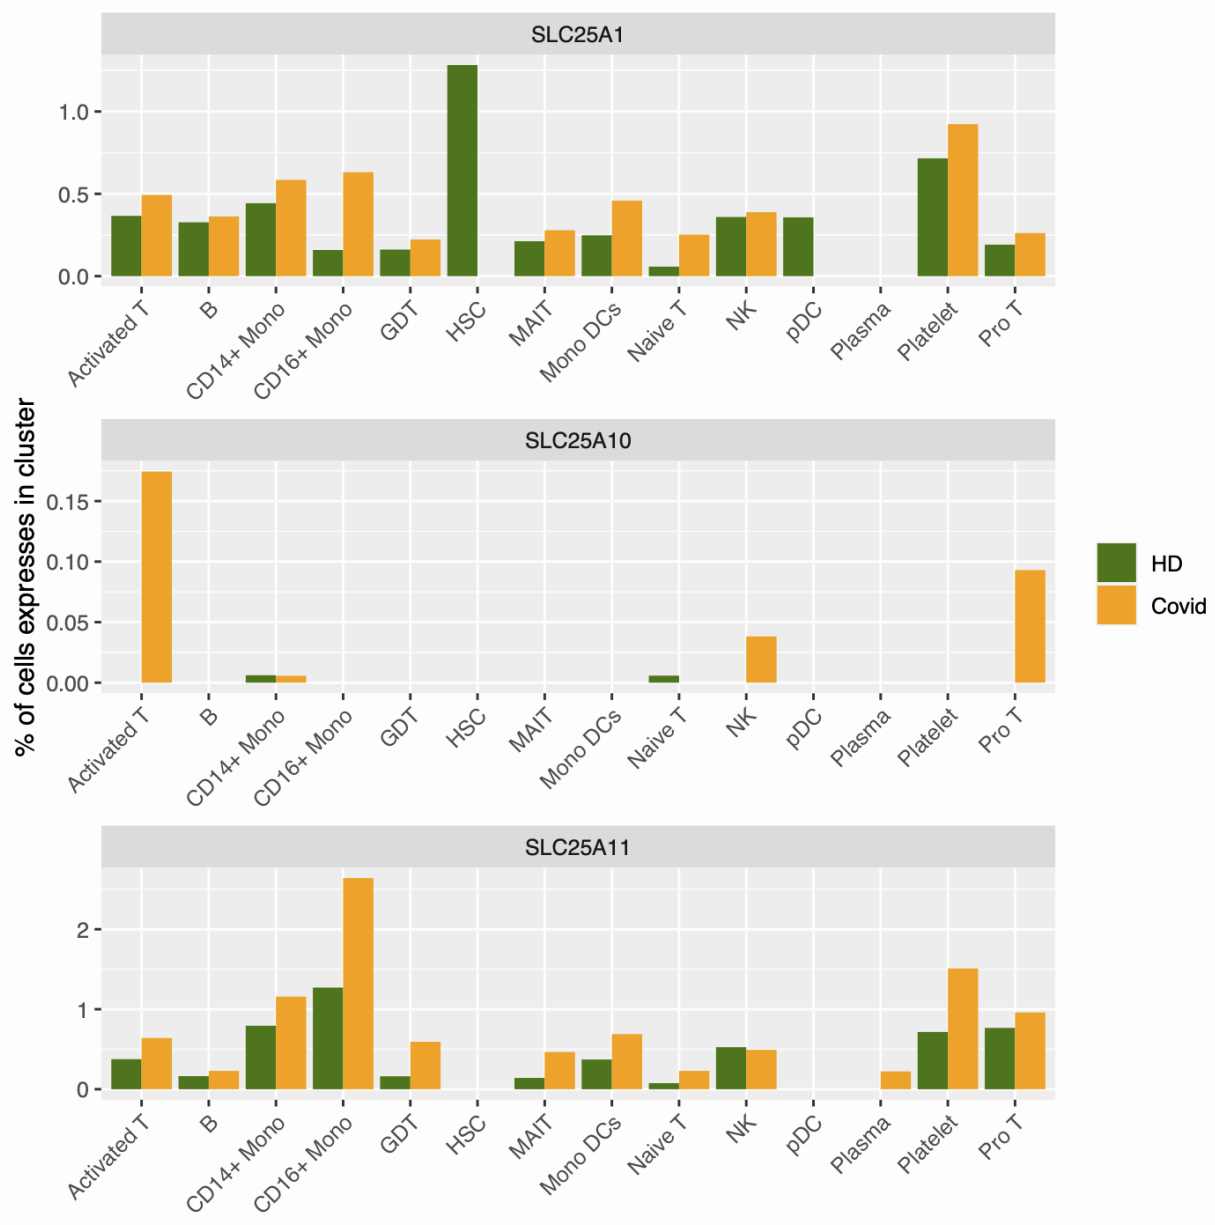

**Figure S6.** Expression of the members of the mitochondrial carrier family (SLC25) (*SLC25A1*, *SLC25A10*, and *SLC25A11*) in different cell types.

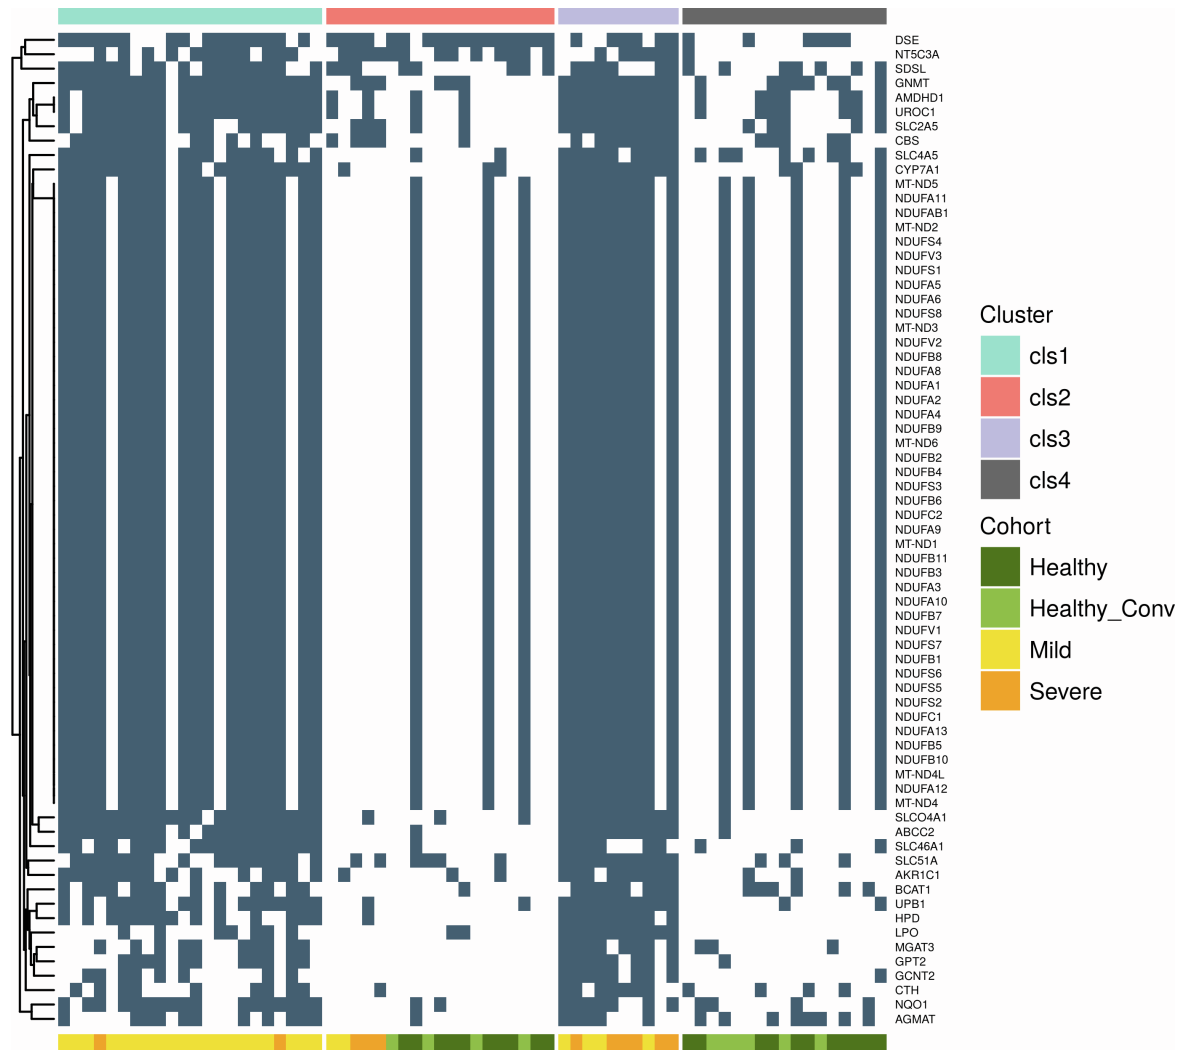

**Figure S7.** Gene essentiality: Genes identified as essential in more than half of the SNF-1 and SNF-3 cluster samples. The top column annotation represents SNF-clusters and the bottom column annotation represents the original cohort definition. An empty cell denotes a non-essential gene in the corresponding sample.



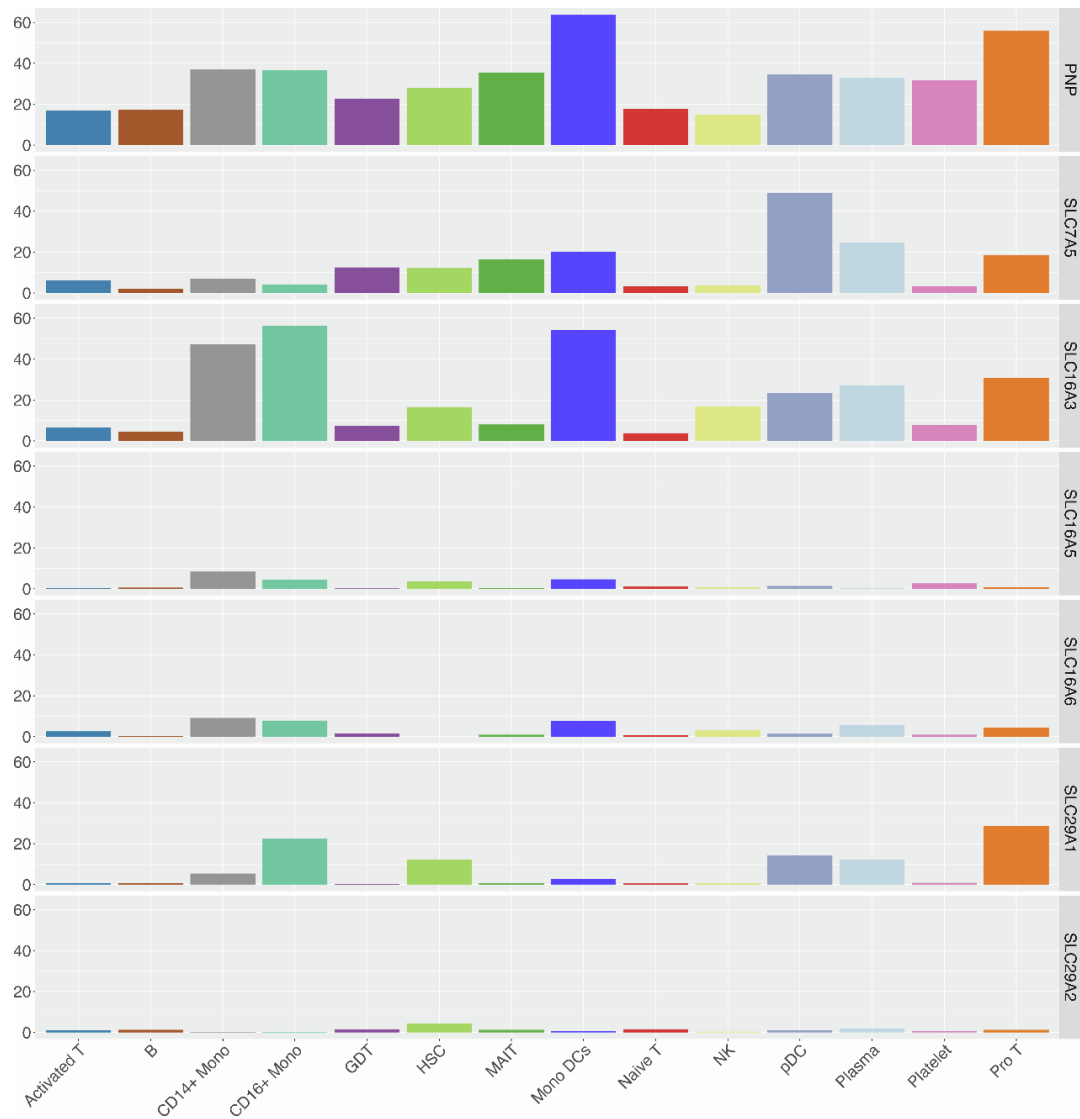

**Figure S8.** Expression of the mitochondrial carrier family (SLC25). Bar graph showing percentage cells in each of the cell typeclusters where the corresponding gene is expressed.

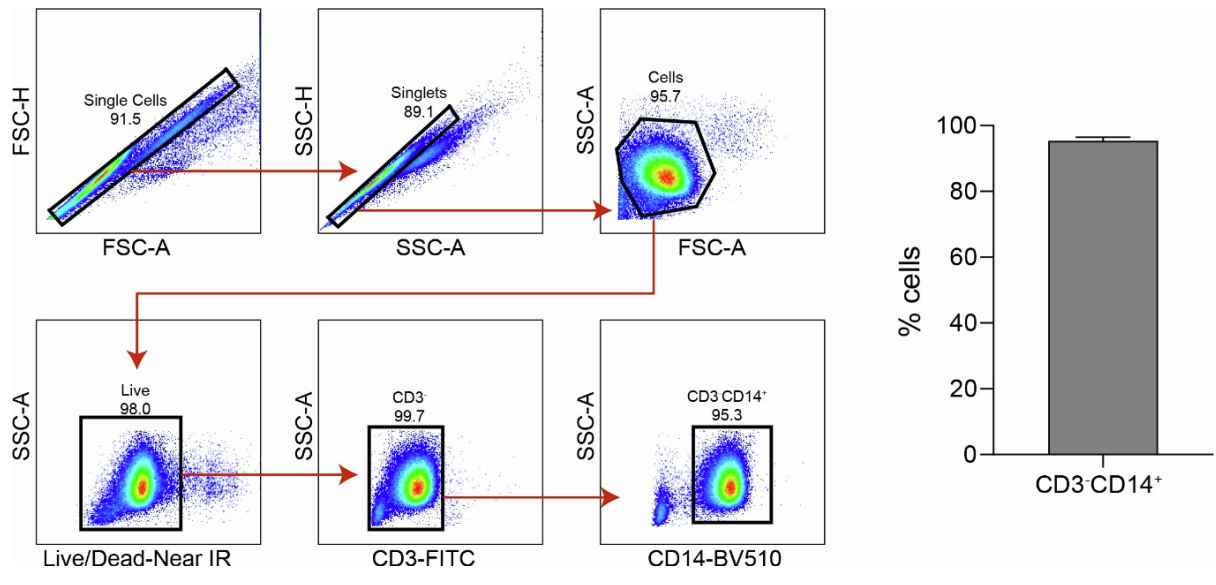

**Figure S9.** Monocyte's purity following negative selection.

**Table S1.** Markers used for immune phenotyping of MNPs

| <b>Abbreviation of cell population</b> | <b>Markers that define this population</b>                                                                                                             |
|----------------------------------------|--------------------------------------------------------------------------------------------------------------------------------------------------------|
| Live cells                             | Live/Dead stain <sup>-</sup>                                                                                                                           |
| Lin <sup>-</sup>                       | CD3 <sup>-</sup> CD19 <sup>-</sup> CD56 <sup>-</sup>                                                                                                   |
| G-MDSC                                 | Lin <sup>-</sup> HLADR <sup>-</sup> CD11b <sup>+</sup> CD33 <sup>+</sup> CD14 <sup>-</sup> CD15 <sup>+</sup>                                           |
| M-MDSC                                 | Lin <sup>-</sup> HLADR <sup>-</sup> CD11b <sup>+</sup> CD33 <sup>+</sup> CD14 <sup>+</sup> CD15 <sup>-</sup>                                           |
| LDG                                    | Lin <sup>-</sup> HLADR <sup>-</sup> CD11b <sup>+</sup> CD33 <sup>+</sup> CD14 <sup>+</sup> CD15 <sup>+</sup> CD16 <sup>-</sup> CD66b <sup>+</sup>      |
| CM                                     | Lin <sup>-</sup> HLADR <sup>+</sup> CD11b <sup>+/-</sup> CD11c <sup>+</sup> CD14 <sup>+</sup> CD16 <sup>-</sup>                                        |
| IM                                     | Lin <sup>-</sup> HLADR <sup>+</sup> CD11b <sup>+/-</sup> CD11c <sup>+</sup> CD14 <sup>+</sup> CD16 <sup>+</sup>                                        |
| NCM / MD-DC                            | Lin <sup>-</sup> HLADR <sup>+</sup> CD11b <sup>+/-</sup> CD11c <sup>+</sup> CD14 <sup>-</sup> CD16 <sup>+</sup>                                        |
| cDC                                    | Lin <sup>-</sup> HLADR <sup>+</sup> CD11b <sup>+/-</sup> CD11c <sup>+</sup> CD14 <sup>-</sup> CD16 <sup>-</sup>                                        |
| DC1                                    | Lin <sup>-</sup> HLADR <sup>+</sup> CD11b <sup>+/-</sup> CD11c <sup>+</sup> CD14 <sup>-</sup> CD16 <sup>-</sup> CD141 <sup>+</sup>                     |
| DC2/DC3                                | Lin <sup>-</sup> HLADR <sup>+</sup> CD11b <sup>+/-</sup> CD11c <sup>+</sup> CD14 <sup>-</sup> CD16 <sup>-</sup> CD1c <sup>+</sup>                      |
| DC4                                    | Lin <sup>-</sup> HLADR <sup>+</sup> CD11b <sup>+/-</sup> CD11c <sup>+</sup> CD14 <sup>-</sup> CD16 <sup>+</sup> CD141 <sup>low</sup> CD1c <sup>-</sup> |
| DC5                                    | Lin <sup>-</sup> HLADR <sup>+</sup> CD11b <sup>+/-</sup> CD11c <sup>-</sup> CD14 <sup>-</sup> CD16 <sup>-</sup> CD303 <sup>-</sup>                     |
| pDC                                    | Lin <sup>-</sup> HLADR <sup>+</sup> CD11b <sup>+/-</sup> CD11c <sup>-</sup> CD14 <sup>-</sup> CD16 <sup>-</sup> CD303 <sup>+</sup>                     |

**Table S2.** Individual patient data

| ID          | Clinical Definitions | SARS-CoV-2 PCR positive | SARS-CoV-2 Serology positive | SNF_cluster | Age (as of 2020) | Gender | BMI   | Comorbidities |
|-------------|----------------------|-------------------------|------------------------------|-------------|------------------|--------|-------|---------------|
| COVID19_20  | HC                   | No                      | No                           | 2           | 55               | Female | 27,16 | no            |
| COVID19_21  | HC                   | No                      | No                           | 2           | 48               | Male   | 24,15 | no            |
| COVID19_1   | HC                   | No                      | No                           | 4           | 55               | Male   | 20,9  | no            |
| COVID19_11  | HC                   | No                      | No                           | 4           | 44               | Male   | 21,46 | no            |
| COVID19_31  | HC                   | No                      | No                           | 4           | 61               | Male   | 21,22 | no            |
| COVID19_2   | HC                   | No                      | No                           | 2           | 46               | Male   | 24,49 | no            |
| COVID19_22  | HC                   | No                      | No                           | 4           | 59               | Male   | 20,99 | no            |
| COVID19_24  | HC                   | No                      | No                           | 2           | 48               | Male   | 32,1  | no            |
| COVID19_4   | HC                   | No                      | No                           | 4           | 45               | Female | 22,73 | no            |
| COVID19_25  | HC                   | No                      | No                           | 2           | 46               | Male   | 24,97 | no            |
| COVID19_5   | HC                   | No                      | No                           | 4           | 62               | Female | 31,99 | no            |
| COVID19_16  | HC                   | No                      | No                           | 2           | 52               | Male   | 39,68 | no            |
| COVID19_6   | HC                   | No                      | No                           | 4           | 41               | Male   | 18,71 | no            |
| COVID19_17  | HC                   | No                      | No                           | 2           | 46               | Male   | 25,17 | no            |
| COVID19_27  | HC                   | No                      | No                           | 2           | 48               | Male   | 24,31 | no            |
| COVID19_7   | HC                   | No                      | No                           | 4           | 49               | Male   | 22,31 | no            |
| COVID19_8   | HC                   | No                      | No                           | 2           | 45               | Male   | 31,35 | no            |
| COVID19_28  | HC                   | No                      | No                           | 4           | 38               | Male   | 23,12 | no            |
| COVID19_9   | HC                   | No                      | No                           | 2           | 60               | Male   | 25,17 | no            |
| COVID19_19  | HC                   | No                      | No                           | 4           | 46               | Male   | 24,38 | no            |
| COVID19_29  | HC                   | No                      | No                           | 4           | 46               | Male   | 19,71 | no            |
| COVID19_10  | Conv                 | No                      | Yes                          | 2           | 65               | Male   | 22,59 | no            |
| COVID19_18  | Conv                 | No                      | Yes                          | 2           | 49               | Male   | 29,34 | no            |
| COVID19_23  | Conv                 | No                      | Yes                          | 2           | 41               | Male   | 28,06 | no            |
| COVID19_32  | Conv                 | No                      | Yes                          | 2           | 43               | Male   | 23,84 | no            |
| COVID19_12  | Conv                 | No                      | Yes                          | 4           | 49               | Female | 25,28 | no            |
| COVID19_13  | Conv                 | No                      | Yes                          | 4           | 48               | Female | 21,15 | no            |
| COVID19_14  | Conv                 | No                      | Yes                          | 4           | 51               | Male   | 21,98 | no            |
| COVID19_15  | Conv                 | No                      | Yes                          | 4           | 66               | Male   | 21,8  | no            |
| COVID19_26  | Conv                 | No                      | Yes                          | 4           | 54               | Female | 24,92 | no            |
| COVID19_3   | Conv                 | No                      | Yes                          | 4           | 50               | Female | 22,99 | no            |
| COVID19_004 | Mild                 | Yes                     | ND                           | 1           | 66               | Male   | 21,08 | no            |
| COVID19_005 | Mild                 | Yes                     | ND                           | 1           | 38               | Female | 28,73 | no            |
| COVID19_008 | Mild                 | Yes                     | ND                           | 1           | 60               | Male   | 28,55 | yes           |
| COVID19_010 | Mild                 | Yes                     | ND                           | 1           | 74               | Male   | 26,83 | yes           |
| COVID19_011 | Mild                 | Yes                     | ND                           | 1           | 64               | Male   | 25,51 | no            |
| COVID19_012 | Mild                 | Yes                     | ND                           | 1           | 48               | Male   | 31,46 | no            |
| COVID19_014 | Mild                 | Yes                     | ND                           | 1           | 63               | Male   | 25,21 | no            |
| COVID19_015 | Mild                 | Yes                     | ND                           | 1           | 44               | Male   | 28,4  | no            |
| COVID19_017 | Mild                 | Yes                     | ND                           | 1           | 47               | Male   | 34,72 | no            |
| COVID19_018 | Mild                 | Yes                     | ND                           | 1           | 38               | Female | 21,37 | no            |
| COVID19_019 | Mild                 | Yes                     | ND                           | 1           | 66               | Male   | 23,85 | yes           |
| COVID19_022 | Mild                 | Yes                     | ND                           | 1           | 61               | Male   | 30,42 | no            |
| COVID19_023 | Mild                 | Yes                     | ND                           | 1           | 59               | Male   | 29,86 | yes           |
| COVID19_024 | Mild                 | Yes                     | ND                           | 1           | 32               | Male   |       | no            |
| COVID19_027 | Mild                 | Yes                     | ND                           | 1           | 57               | Male   | 28,01 | yes           |
| COVID19_029 | Mild                 | Yes                     | ND                           | 1           | 50               | Male   | 27,71 | no            |
| COVID19_032 | Mild                 | Yes                     | ND                           | 1           | 59               | Male   | 31,02 | no            |
| COVID19_036 | Mild                 | Yes                     | ND                           | 1           | 69               | Male   | 30,08 | yes           |
| COVID19_039 | Mild                 | Yes                     | ND                           | 1           | 64               | Female | 23,94 | no            |
| COVID19_041 | Mild                 | Yes                     | ND                           | 1           | 34               | Male   | 32,25 | no            |
| COVID19_001 | Mild                 | Yes                     | ND                           | 2           | 45               | Female | 23,73 | no            |
| COVID19_006 | Mild                 | Yes                     | ND                           | 2           | 59               | Male   | 31,35 | yes           |
| COVID19_002 | Mild                 | Yes                     | ND                           | 3           | 44               | Female | 54,14 | yes           |
| COVID19_013 | Mild                 | Yes                     | ND                           | 3           | 53               | Male   |       | yes           |
| COVID19_016 | Mild                 | Yes                     | ND                           | 3           | 72               | Male   | 21,91 | yes           |
| COVID19_030 | Mild                 | Yes                     | ND                           | 3           | 59               | Male   | 34,88 | yes           |
| COVID19_009 | Severe               | Yes                     | ND                           | 1           | 52               | Male   | 30,97 | yes           |
| COVID19_034 | Severe               | Yes                     | ND                           | 1           | 76               | Male   | 26,83 | no            |
| COVID19_028 | Severe               | Yes                     | ND                           | 2           | 71               | Male   | 26,57 | no            |
| COVID19_033 | Severe               | Yes                     | ND                           | 2           | 52               | Male   | 34,56 | yes           |
| COVID19_037 | Severe               | Yes                     | ND                           | 2           | 62               | Male   | 40,14 | yes           |
| COVID19_007 | Severe               | Yes                     | ND                           | 3           | 39               | Male   | 24,49 | no            |
| COVID19_020 | Severe               | Yes                     | ND                           | 3           | 75               | Male   | 28,31 | yes           |
| COVID19_021 | Severe               | Yes                     | ND                           | 3           | 65               | Male   | 25,66 | yes           |
| COVID19_026 | Severe               | Yes                     | ND                           | 3           | 58               | Male   | 24,94 | no            |
| COVID19_031 | Severe               | Yes                     | ND                           | 3           | 55               | Male   | 19,2  | yes           |
| COVID19_035 | Severe               | Yes                     | ND                           | 3           | 57               | Male   | 33,26 | yes           |

**Table S3.** Flux balance analysis

| HMR ID          | Flux Direction      | Equation                                                            |
|-----------------|---------------------|---------------------------------------------------------------------|
| <b>r2377</b>    | Neg flux HC         | AKG[c] + cis-aconitate[m] <=> AKG[m] + cis-aconitate[c]             |
| <b>r2378</b>    | Neg COVID           | cis-aconitate[m] + succinate[c] <=> cis-aconitate[c] + succinate[m] |
| <b>HMR_4855</b> | Pos COVID           | fumarate[c] + malate[m] <=> fumarate[m] + malate[c]                 |
| <b>HMR_4852</b> | Neg COVID<br>Pos HC | AKG[c] + malate[m] <=> AKG[m] + malate[c]                           |
| <b>HMR_8741</b> | Neg COVID           | fumarate[c] + sulfite[m] <=> fumarate[m] + sulfite[c]               |
| <b>HMR_4872</b> | Neg COVID           | malonate[c] + sulfite[m] <=> malonate[m] + sulfite[c]               |
| <b>HMR_6522</b> | Neg COVID           | malate[c] + thiosulfate[m] <=> malate[m] + thiosulfate[c]           |
| <b>HMR_4851</b> | Pos COVID           | AKG[c] + succinate[m] <=> AKG[m] + succinate[c]                     |
| <b>HMR_4864</b> | Pos COVID           | succinate[c] + sulfite[m] <=> succinate[m] + sulfite[c]             |
| <b>HMR_4868</b> | Pos COVID           | malate[c] + sulfite[m] <=> malate[m] + sulfite[c]                   |
| <b>HMR_4863</b> | Pos COVID           | succinate[c] + sulfate[m] <=> succinate[m] + sulfate[c]             |
| <b>HMR_4867</b> | Neg COVID           | malate[c] + sulfate[m] <=> malate[m] + sulfate[c]                   |
| <b>HMR_4871</b> | Pos COVID           | malonate[c] + sulfate[m] <=> malonate[m] + sulfate[c]               |
| <b>HMR_8742</b> | Neg COVID           | fumarate[c] + sulfate[m] <=> fumarate[m] + sulfate[c]               |
| <b>HMR_6521</b> | Pos COVID           | fumarate[c] + thiosulfate[m] <=> fumarate[m] + thiosulfate[c]       |

**Table S4.** MRM transitions for GC-QQQ-MS analysis. RT=retention time; CE = Collision Energy.

| <b>Compound</b>              | <b>RT (min)</b> | <b>Quantifier</b> | <b>CE</b> | <b>Qualifier</b> | <b>CE</b> |
|------------------------------|-----------------|-------------------|-----------|------------------|-----------|
| aconitic acid                | 5.24            | 375→147           | 10        | 375→211          | 10        |
| alpha-keto-glutaric acid     | 4.75            | 288→73            | 20        | 288→198          | 10        |
| alpha-ketoglutaric acid (IS) | 4.75            | 308→147           | 10        | -                | -         |
| citric acid                  | 5.42            | 183→73            | 10        | 183→183          | 10        |
| citric acid (IS)             | 5.42            | 276→185           | 10        | -                | -         |
| fumaric acid                 | 4.00            | 245→73            | 20        | 245→245          | 10        |
| fumaric acid (IS)            | 4.00            | 249→147           | 10        | -                | -         |
| glucose                      | 5.7             | 319→129           | 10        | 319→157          | 10        |
| glucose (IS)                 | 5.7             | 323→132           | 10        | -                | -         |
| glucose 6-phosphate          | 6.73            | 387→387           | 10        | 387→73           | 40        |
| isocitric acid               | 5.47            | 245→73            | 20        | 245→83           | 20        |
| lactic acid                  | 2.72            | 219→147           | 10        | 219→191          | 10        |
| malic acid                   | 4.5             | 335→147           | 10        | 335→73           | 10        |
| malic acid (IS)              | 4.5             | 339→147           | 20        | -                | -         |
| methyl stearate (IS)         | 6.2             | 298→101           | 20        | -                | -         |
| shikimic acid                | 5.4             | 462→204           | 10        | 462→254          | 20        |
| succinic acid                | 3.9             | 262→73            | 10        | 262→113          | 10        |
| succinic acid (IS)           | 3.9             | 251→147           | 20        | -                | -         |
| sucrose                      | 7.31            | 437→257           | 20        | 437→303          | 10        |
| sucrose (IS)                 | 7.31            | 442→262           | 10        | -                | -         |
| Urea                         | 3.35            | 261→147           | 20        | 261→245          | 10        |
